# Supplementary material for: Population Genetic Analysis of Modern and Ancient DNA Variations Yields New Insights Into the Formation, Genetic Structure, and Phylogenetic Relationship of Northern Han Chinese
Source: Front Genet. 2019 Oct 30;10:1045. doi: 10.3389/fgene.2019.01045 (PMC6832103; doi:10.3389/fgene.2019.01045)
Supplement: Supplementary file 5 [file Table_4.xlsx]

## Sheet: Sheet1
Table S4. The Nei’s standard genetic distances between Shanxi Han and 52 worldwide populations on the basis of genetic variations of 20 autosomal STRs.
Population names	Reference	Abbreations	SXH	AHU	APRDH	ANWH	ASCT	AXKU	AHNH	ASLY	ASLT	ASH1	ASH2	AXJU1	ATT	AXJU2	AGDH	ACCH	AXMH	AGZH	AXJK	AXJU3	AUM	AB	SAI	AJ	AK1	AK2	NANM	NAWMM	NAMMM	ESP	ESPA	EP	ENI	OASDA	OAA	OAC	OAPA	ONZEP	ONWP	ONZC	SANB	SANEB	SACWB	SASEB	SASB	SAAC	SAP
Shanxi-Han		SXH
Hotan-Uyghur		AHU	0.028811
Pearl-River-Delta-Han	(He et al., 2018b)	APRDH	0.009835	0.032405
Ningxia-Wuzhong-Hui	(Liu et al., 2019)	ANWH	0.007244	0.027521	0.014405
Sichuan-Chengdu-Tibetan	(Liu et al., 2019)	ASCT	0.020702	0.046103	0.031102	0.025945
Xinjiang-Kumul-Uyghur	(Liu et al., 2019)	AXKU	0.04913	0.035154	0.061569	0.047445	0.0691
Hainan-Han	(Wang et al., 2018)	AHNH	0.011605	0.035651	0.007238	0.014558	0.03585	0.058809
Sichuan-Liangshan-Yi	(Wang et al., 2018)	ASLY	0.011542	0.034869	0.022279	0.017582	0.018104	0.051861	0.025526
Sichuan-Liangshan-Tibetan	(Wang et al., 2018)	ASLT	0.020997	0.041612	0.035034	0.021898	0.021706	0.059863	0.034489	0.020413
Sihcuan-Han-1	(He et al., 2018a)	ASH1	0.004233	0.031182	0.009551	0.011909	0.025531	0.056024	0.013876	0.014787	0.028519
Sihcuan-Han-2	(Wang, 2016)	ASH2	0.00569	0.032275	0.01334	0.012256	0.028893	0.055827	0.015223	0.017996	0.030585	0.002204
Xinjiang-Uyghur-1	(Wang, 2016)	AXJU1	0.048194	0.02514	0.049551	0.042108	0.069616	0.054914	0.052553	0.053009	0.060565	0.048191	0.048381
Tibet-Tibetan	(Wang, 2016)	ATT	0.02238	0.04193	0.032929	0.024153	0.019325	0.062335	0.037895	0.020123	0.025653	0.026873	0.030155	0.059874
Xinjiang-Uyghur-2	(Jin et al., 2017)	AXJU2	0.029245	0.00509	0.031624	0.02826	0.046639	0.035973	0.036222	0.035857	0.043186	0.029748	0.031169	0.02302	0.041404
Guangdong-Han	(Zhang et al., 2016a)	AGDH	0.003717	0.027627	0.00335	0.009241	0.022807	0.050824	0.007339	0.01352	0.024723	0.005403	0.00828	0.044568	0.02404	0.026864
Central-Chinese-Han	(Liu et al., 2017)	ACCH	0.001275	0.02907	0.009701	0.007182	0.01983	0.048625	0.011495	0.010691	0.021649	0.004	0.005309	0.047764	0.022583	0.029212	0.003411
Xiamen-Han	(Wu et al., 2017)	AXMH	0.004526	0.032425	0.005237	0.010401	0.025745	0.054441	0.007324	0.018431	0.027419	0.007607	0.009199	0.050193	0.027132	0.033216	0.003523	0.005159
Guizhou-Han	(Yang et al., 2017)	AGZH	0.005054	0.032963	0.003237	0.010382	0.025421	0.057551	0.008546	0.016008	0.029969	0.006107	0.009356	0.050483	0.025831	0.032793	0.002532	0.005167	0.004126
Xinjiang-Kazakh	(Zhang et al., 2016b)	AXJK	0.02757	0.008269	0.036753	0.02805	0.042989	0.032569	0.03887	0.032423	0.03853	0.029994	0.030749	0.026145	0.036768	0.00884	0.027843	0.027814	0.03416	0.033981
Xinjiang-Uyghur-3	(Zhang et al., 2016a)	AXJU3	0.026185	0.001949	0.030662	0.024812	0.043806	0.032428	0.032918	0.032177	0.039566	0.028688	0.029592	0.022222	0.038804	0.003493	0.025053	0.026491	0.030377	0.030678	0.006707
Ulaanbaatar-Mongolian	(Choi et al., 2017)	AUM	0.023984	0.022614	0.03581	0.026241	0.043366	0.044987	0.036993	0.027975	0.034599	0.025333	0.025824	0.038196	0.036632	0.020586	0.02571	0.023267	0.031671	0.03131	0.011413	0.018857
Bangladeshi	(Hossain et al., 2016)	AB	0.067824	0.031629	0.063991	0.061233	0.080924	0.073781	0.068649	0.068242	0.08237	0.069744	0.072544	0.055888	0.069052	0.037679	0.061492	0.067421	0.067373	0.06405	0.044638	0.031632	0.064132
Indian	(Singh and Nandineni, 2017)	SAI	0.071912	0.029399	0.067199	0.063667	0.087785	0.066859	0.072247	0.074312	0.087797	0.073272	0.077627	0.053706	0.079449	0.035477	0.06576	0.072186	0.072886	0.068622	0.044742	0.029481	0.069054	0.012967
Japanese	(Fujii et al., 2014)	AJ	0.021422	0.037801	0.026138	0.027032	0.044129	0.060094	0.029358	0.033021	0.04842	0.024581	0.027275	0.056991	0.047522	0.040229	0.020398	0.021985	0.023243	0.024943	0.036689	0.036436	0.039675	0.074773	0.070117
Korean-1	(Park et al., 2013)	AK1	0.007366	0.0307	0.014184	0.012201	0.030295	0.046931	0.017077	0.019165	0.031152	0.012602	0.014487	0.048962	0.031932	0.032078	0.008418	0.008053	0.010046	0.010662	0.030647	0.02812	0.026836	0.070705	0.069962	0.013389
Korean-2	(Park et al., 2016)	AK2	0.007365	0.030265	0.014395	0.010992	0.026953	0.048628	0.017642	0.018399	0.028578	0.013136	0.015653	0.051524	0.029204	0.033538	0.008523	0.007858	0.00986	0.010444	0.031067	0.028489	0.027602	0.069031	0.068866	0.01358	0.003198
Native-American	(Ng et al., 2016)	NANM	0.144508	0.105541	0.146373	0.153998	0.153064	0.140223	0.163789	0.143428	0.164041	0.143449	0.155984	0.130853	0.145084	0.100072	0.138963	0.14858	0.155012	0.148033	0.10321	0.104483	0.116865	0.150525	0.131304	0.125384	0.139875	0.1344
West-Mexican-Mestizo	(Aguilar-Velazquez et al., 2016)	NAWMM	0.096362	0.049639	0.09803	0.099464	0.110803	0.080579	0.107228	0.102037	0.114011	0.095576	0.100917	0.076185	0.106336	0.05043	0.093046	0.100085	0.103382	0.101168	0.056587	0.050247	0.078793	0.099142	0.079746	0.086396	0.092195	0.091044	0.036605
Monterrey-Mexican-Mestizo	(Ramos-Gonzalez et al., 2016)	NAMMM	0.143983	0.094916	0.142634	0.14789	0.155296	0.117578	0.152032	0.147917	0.159492	0.144046	0.150717	0.123427	0.145589	0.091864	0.13834	0.148755	0.148068	0.147127	0.096366	0.094755	0.123978	0.137239	0.121293	0.12522	0.13996	0.136983	0.040041	0.030312
South-Portuguese	(Almeida et al., 2015)	ESP	0.096109	0.036585	0.091171	0.088693	0.119306	0.06533	0.094878	0.104927	0.114104	0.097325	0.096852	0.054718	0.10821	0.040682	0.089459	0.098112	0.095439	0.098	0.048751	0.03712	0.084901	0.076962	0.066495	0.094269	0.092156	0.09386	0.135853	0.053791	0.090087
Southern-Portugal-Angolan	(Guerreiro et al., 2017)	ESPA	0.148654	0.099256	0.14746	0.133282	0.163392	0.141246	0.140504	0.149988	0.149718	0.148034	0.148732	0.104726	0.145975	0.09678	0.140308	0.145438	0.145351	0.152775	0.108077	0.097356	0.123676	0.123897	0.121621	0.145496	0.142213	0.1432	0.207037	0.140775	0.182554	0.100234
Polish	(Ossowski et al., 2017)	EP	0.129745	0.056545	0.126229	0.116063	0.157907	0.088463	0.12801	0.142985	0.146491	0.132277	0.130521	0.072367	0.14755	0.061531	0.123632	0.132726	0.131364	0.134186	0.069328	0.056643	0.111057	0.095562	0.084554	0.127302	0.126632	0.129028	0.167018	0.07674	0.117561	0.016325	0.126691
Northern-Italian	(Westen et al., 2012)	ENI	0.128399	0.058304	0.124995	0.117756	0.146648	0.08667	0.127622	0.135978	0.142048	0.127562	0.12742	0.076443	0.138119	0.061905	0.122843	0.129647	0.130269	0.131141	0.071227	0.058959	0.108409	0.091227	0.078987	0.127021	0.123509	0.125286	0.173339	0.07867	0.122564	0.022945	0.119555	0.034969
Australian--Aboriginal	(Taylor et al., 2017)	OASDA	0.112763	0.061619	0.104926	0.100353	0.12895	0.097516	0.114485	0.114855	0.120559	0.111005	0.117432	0.07578	0.114271	0.066357	0.103142	0.11389	0.117112	0.111614	0.073118	0.060505	0.102925	0.071782	0.053325	0.104034	0.105289	0.106115	0.128642	0.075613	0.110046	0.061192	0.132518	0.07471	0.079356
Australian-Asian	(Taylor et al., 2017)	OAA	0.014411	0.022978	0.005672	0.017208	0.033598	0.052826	0.012922	0.02581	0.034494	0.013328	0.017171	0.038869	0.035897	0.022566	0.007327	0.014571	0.010892	0.009237	0.026139	0.02115	0.031334	0.058473	0.056465	0.029171	0.017987	0.018487	0.131695	0.078481	0.122135	0.069539	0.131006	0.098068	0.099954	0.081791
Australian-Caucasian	(Taylor et al., 2017)	OAC	0.10759	0.038634	0.102926	0.100115	0.13035	0.073072	0.107514	0.115758	0.123321	0.107165	0.108059	0.055631	0.117872	0.04358	0.101219	0.109957	0.111055	0.110722	0.050473	0.0397	0.08967	0.078994	0.064479	0.103977	0.104356	0.105195	0.129349	0.051811	0.090218	0.007699	0.110634	0.014949	0.02499	0.052937	0.077115
Australian-Pure-Aboriginal	(Taylor et al., 2017)	OAPA	0.150966	0.111808	0.1418	0.136174	0.16508	0.145999	0.152805	0.152246	0.1548	0.148487	0.160463	0.125548	0.155048	0.116095	0.140733	0.150937	0.155777	0.147866	0.123678	0.110707	0.14567	0.110559	0.085032	0.137811	0.138849	0.139908	0.165453	0.128139	0.158972	0.134955	0.182981	0.155055	0.149304	0.024587	0.121435	0.127392
New-Zealand-East-Polynesian	(Taylor et al., 2017)	ONZEP	0.170666	0.147046	0.1655	0.17304	0.184852	0.171039	0.180485	0.167871	0.197119	0.159492	0.164992	0.162324	0.171487	0.148882	0.166078	0.171397	0.17223	0.169572	0.155669	0.150228	0.17008	0.192271	0.175569	0.168561	0.166503	0.166892	0.232466	0.185784	0.226891	0.169497	0.181792	0.207834	0.180319	0.219156	0.150622	0.16839	0.277558
New-Zealand-West-Polynesian	(Taylor et al., 2017)	ONWP	0.138399	0.115072	0.131543	0.141729	0.155541	0.154995	0.140451	0.139606	0.158085	0.124069	0.13348	0.130486	0.144552	0.113217	0.132506	0.138066	0.142649	0.138616	0.127027	0.116431	0.143864	0.140837	0.124163	0.139172	0.145381	0.147329	0.16857	0.134157	0.160779	0.14649	0.142698	0.178799	0.154027	0.135049	0.116373	0.141162	0.168523	0.094119
New-Zealand-Caucasian	(Taylor et al., 2017)	ONZC	0.148484	0.084167	0.143524	0.1411	0.168448	0.11578	0.152194	0.153044	0.163937	0.146465	0.145152	0.093431	0.155104	0.089886	0.143256	0.152617	0.147631	0.151338	0.094969	0.08387	0.136698	0.135488	0.120908	0.147537	0.143987	0.144404	0.19468	0.102232	0.139052	0.035744	0.142027	0.045685	0.05535	0.102938	0.115274	0.036379	0.187095	0.150475	0.174099
North-Brazilian	(Moyses et al., 2017)	SANB	0.09966	0.048506	0.102555	0.098892	0.114714	0.076067	0.111346	0.104275	0.121087	0.097061	0.10043	0.071563	0.108693	0.049513	0.095453	0.102482	0.105896	0.107125	0.051977	0.048405	0.08174	0.084738	0.072196	0.086134	0.097484	0.095311	0.063588	0.022622	0.044029	0.037251	0.113177	0.060278	0.065812	0.067641	0.082278	0.039272	0.126746	0.170756	0.12625	0.080926
Northeast-Brazilian	(Moyses et al., 2017)	SANEB	0.08865	0.033008	0.089864	0.082256	0.111671	0.065823	0.08979	0.095151	0.104183	0.087584	0.087994	0.050518	0.097094	0.034522	0.084467	0.090629	0.090749	0.093622	0.04123	0.032729	0.069778	0.071278	0.061378	0.086999	0.088471	0.087686	0.109577	0.042794	0.073442	0.014871	0.062472	0.034075	0.037977	0.064691	0.068042	0.019853	0.132188	0.153125	0.115415	0.053747	0.025097
Central-West-Brazilian	(Moyses et al., 2017)	SACWB	0.092377	0.035487	0.089536	0.08701	0.113477	0.069619	0.094049	0.097063	0.108461	0.091604	0.094717	0.054333	0.100356	0.037791	0.085122	0.093599	0.093915	0.094018	0.042775	0.035143	0.071425	0.068317	0.060667	0.084783	0.08785	0.086179	0.090635	0.035739	0.068915	0.017193	0.06935	0.039178	0.041982	0.056164	0.068269	0.021795	0.120557	0.160689	0.117276	0.056433	0.019791	0.008858
Southeast-Brazilian	(Moyses et al., 2017)	SASEB	0.104506	0.042951	0.10359	0.099371	0.124889	0.072463	0.104101	0.1098	0.115264	0.104283	0.107006	0.062138	0.110152	0.04437	0.098487	0.107079	0.106416	0.109749	0.050865	0.041826	0.081711	0.080819	0.068504	0.095479	0.099828	0.100375	0.115326	0.046141	0.075165	0.015016	0.067753	0.034051	0.033326	0.061472	0.078776	0.019081	0.127027	0.156944	0.119684	0.050114	0.027338	0.009348	0.010002
South-Brazilian	(Moyses et al., 2017)	SASB	0.115871	0.056161	0.113761	0.111822	0.13965	0.086922	0.120007	0.123068	0.135175	0.113774	0.115731	0.077279	0.127632	0.060046	0.11049	0.117971	0.120061	0.118801	0.067706	0.055801	0.098207	0.089843	0.075051	0.109321	0.112537	0.113725	0.119008	0.056452	0.101055	0.039407	0.112832	0.041528	0.061595	0.074073	0.092203	0.036639	0.141842	0.181005	0.142839	0.073063	0.047333	0.038658	0.03801	0.039631
Chubut-Argentinian	(Parolin et al., 2015)	SAAC	0.109259	0.054308	0.108693	0.109834	0.13163	0.087436	0.119816	0.119225	0.134275	0.108746	0.11382	0.084582	0.123411	0.053893	0.104973	0.114057	0.115779	0.11383	0.063026	0.055495	0.091943	0.093837	0.074576	0.093161	0.102613	0.099565	0.044179	0.016673	0.031971	0.047366	0.149558	0.068538	0.071667	0.073245	0.090648	0.044938	0.128894	0.183917	0.138967	0.096962	0.020438	0.041084	0.033	0.04392	0.05638
Paraguay	(Vullo et al., 2016)	SAP	0.098277	0.046979	0.09962	0.097226	0.121876	0.073381	0.106455	0.105661	0.124698	0.097266	0.100756	0.069688	0.108546	0.049467	0.094116	0.102163	0.102889	0.103895	0.052232	0.045911	0.079544	0.084525	0.06811	0.079879	0.093475	0.090891	0.053748	0.017522	0.039161	0.03501	0.130273	0.055005	0.061819	0.064342	0.080352	0.034998	0.122185	0.180088	0.136471	0.078449	0.011551	0.027274	0.022216	0.029526	0.045014	0.012769
Ecuador	(Gaviria et al., 2013)	SAE	0.138378	0.095566	0.141339	0.145465	0.149657	0.128454	0.15334	0.143193	0.157324	0.135308	0.143424	0.129198	0.146445	0.095346	0.135407	0.144653	0.145572	0.146035	0.095438	0.096457	0.117143	0.14573	0.125924	0.117975	0.138048	0.130856	0.027239	0.025123	0.031215	0.106494	0.208178	0.13474	0.14266	0.119721	0.123585	0.10356	0.16725	0.227907	0.166159	0.154862	0.034826	0.083433	0.070305	0.088799	0.101197	0.0279	0.03134
Afrikaaner	(Ristow et al., 2016)	SAA	0.125111	0.052551	0.123376	0.117715	0.143597	0.082157	0.125355	0.130847	0.131478	0.125243	0.125341	0.069383	0.132135	0.057122	0.120358	0.127238	0.127464	0.13	0.06282	0.053119	0.101868	0.09629	0.085298	0.122042	0.122944	0.123759	0.148019	0.064884	0.101117	0.015109	0.119914	0.021483	0.03118	0.078395	0.09583	0.011146	0.163517	0.178332	0.157992	0.040878	0.048692	0.026662	0.030221	0.024341	0.043836	0.058321	0.044456
Asian-Indian	(Ristow et al., 2016)	SAAI	0.081224	0.044016	0.078682	0.074787	0.097459	0.077826	0.082734	0.080413	0.099477	0.083795	0.087246	0.070362	0.08886	0.050927	0.076921	0.081283	0.084316	0.079603	0.05911	0.041898	0.079439	0.022566	0.018434	0.083349	0.078687	0.078054	0.153318	0.099929	0.141537	0.080288	0.13771	0.105591	0.095654	0.069252	0.071773	0.082085	0.098386	0.200539	0.145813	0.132694	0.087802	0.078183	0.073721	0.085603	0.091231	0.095225	0.0832
Cape-Coloured	(Ristow et al., 2016)	SACC	0.117956	0.073689	0.117358	0.104341	0.129036	0.104937	0.113802	0.119875	0.116961	0.117733	0.120469	0.083984	0.115996	0.075662	0.113396	0.120401	0.11912	0.119825	0.082175	0.071319	0.1022	0.089753	0.079169	0.126763	0.11665	0.117249	0.178871	0.112762	0.158782	0.0864	0.09387	0.107183	0.104004	0.102143	0.099931	0.09029	0.152382	0.187414	0.143464	0.13094	0.101373	0.070491	0.076693	0.078616	0.102004	0.118986	0.104691
AmaXhosa	(Ristow et al., 2016)	SAAX	0.203074	0.160671	0.20152	0.19134	0.224031	0.214	0.194666	0.19321	0.201897	0.204868	0.207596	0.164276	0.197257	0.163356	0.194437	0.199469	0.199345	0.205812	0.170295	0.16221	0.178678	0.174322	0.178243	0.203076	0.200672	0.199281	0.260349	0.202236	0.240878	0.180809	0.081987	0.215727	0.199597	0.201958	0.190082	0.188177	0.253405	0.236227	0.189945	0.23059	0.180532	0.137555	0.139324	0.143392	0.184236	0.209806	0.197939
AmaZulu	(Ristow et al., 2016)	SAAZ	0.181117	0.128749	0.183409	0.168286	0.187213	0.181528	0.177384	0.170359	0.175166	0.181132	0.18287	0.133278	0.173421	0.125962	0.174859	0.178533	0.179773	0.18591	0.139535	0.126829	0.153533	0.141997	0.140857	0.182436	0.178051	0.179433	0.235616	0.177611	0.216813	0.138336	0.027523	0.166579	0.154793	0.161547	0.167453	0.145313	0.210867	0.194317	0.162751	0.171931	0.144578	0.095483	0.103044	0.101698	0.142719	0.182576	0.168376
Aguilar-Velazquez, J.A., Martinez-Cortes, G., Inclan-Sanchez, A., Romero-Renteria, O., Diaz-Navarro, X.X., and Rangel-Villalobos, H. (2016). Population data of 23 STR loci (PowerPlex(R) Fusion System) in Mexican Mestizos from the West Region. Int J Legal Med 130, 1489-1491. Almeida, C., Ribeiro, T., Oliveira, A.R., Porto, M.J., Costa Santos, J., Dias, D., and Dario, P. (2015). Population data of …
[truncated: 6 more columns]
